# Supplementary material
Source: PubMed Central journal article supplement (PMC3461324)
Supplement: NIHMS379230-supplement-Supporting_Information.pdf [file NIHMS379230-supplement-Supporting_Information.pdf]

Supporting Information

© Wiley-VCH 2012

69451 Weinheim, Germany

**A Designed Functional Metalloenzyme that Reduces O<sub>2</sub> to H<sub>2</sub>O with Over One Thousand Turnovers\*\***

*Kyle D. Miner, Arnab Mukherjee, Yi-Gui Gao, Eric L. Null, Igor D. Petrik, Xuan Zhao, Natasha Yeung, Howard Robinson, and Yi Lu\**

anie\_201201981\_sm\_miscellaneous\_information.pdf

## Materials and Methods

All chemicals, unless otherwise specified, were obtained from Sigma (St. Louis, MO) or Fisher Scientific (Hampton, NH).

### *Purification of Proteins*

The F33Y and G65Y mutations were introduced into Cu<sub>B</sub>Mb using a protocol previously described<sup>1</sup> and confirmed by DNA sequencing at the Biotechnology Center of the University of Illinois. E-F33Y-Cu<sub>B</sub>Mb and E-G65Y-Cu<sub>B</sub>Mb were purified from inclusion bodies with a yield of ~20 mg/L using a protocol previously described<sup>2</sup> with the following changes: R/Z was calculated using A<sub>408</sub>/A<sub>280</sub> for F33Y-Cu<sub>B</sub>Mb, and A<sub>410</sub>/A<sub>280</sub> for E-G65Y-Cu<sub>B</sub>Mb; for E-G65Y-Cu<sub>B</sub>Mb and E-F33Y-Cu<sub>B</sub>Mb protein with an R/Z values of  $\geq 3.5$  and  $\geq 4$ , respectively, were used. E-Cu<sub>B</sub>Mb was purified as previously described<sup>1</sup> using a modified protocol for WTswMb.

### *Crystallization of Cu<sub>B</sub>Mb and F33Y-Cu<sub>B</sub>Mb*

E-Cu<sub>B</sub>Mb (2.2 mM) in 20 mM tris(hydroxymethyl)aminomethane (tris) pH 8 (pH adjusted H<sub>2</sub>SO<sub>4</sub>), was mixed 1:1 with well buffer (0.2 M sodium acetate, 0.1 M tris hydrochloride pH 8.5, with 30% polyethylene glycol 4000) using the hanging drop method, with 300  $\mu$ L well buffer in the well of the crystallization tray.

E-F33Y-Cu<sub>B</sub>Mb (1.0 mM) in 100 mM tris pH 8, (pH adjusted H<sub>2</sub>SO<sub>4</sub>), was mixed 1:3 with well buffer (0.1 M sodium cacodylate pH 6.5, 0.2 M sodium acetate trihydrate with 30% w/v polyethylene glycol 8000) using the hanging drop method with 300  $\mu$ L well buffer in the well of the crystallization tray.

For the copper containing structure of F33Y Cu<sub>B</sub>Mb, crystals obtained as described above were soaked with 10 eq CuSO<sub>4</sub> in a mixture of E-F33Y Cu<sub>B</sub>Mb and well buffer consistent with the original drop conditions to avoid dissolving the crystals and subsequently with 15eq potassium cyanide, in a mixture of E-F33Y-Cu<sub>B</sub>Mb and well buffer using pH 7.0 sodium cacodylate.

### *Diffraction Data Collection*

The crystals were first soaked briefly in cryoprotectant (30 % polyethylene glycol 400) and were flash frozen in liquid nitrogen. The diffraction data sets summarized in Supplementary Table 2 were collected at the National Synchrotron Light Source beamlines X12B, X26C, X29A (Upton, NY) and were processed with HKL2000 software<sup>3</sup>.

### *Crystal Structure Determination*

The crystal structure was solved by the molecular replacement method using MOLREP<sup>4</sup> in the CCP4 Package<sup>5</sup>. Initial refinement was performed using X-plor<sup>6</sup> and SHELX'97<sup>7</sup>. For E-Cu<sub>B</sub>Mb structure position of H43 and H29 was rebuilt using the program O<sup>8</sup>. For the E-F33Y-Cu<sub>B</sub>Mb the position of Y33 was rebuilt using the program O. Final refinements of E-F33Y-Cu<sub>B</sub>Mb and Cu-F33Y-Cu<sub>B</sub>Mb were carried out with the aid of Refmac<sup>9</sup> and Coot<sup>10</sup>.

### *Computer Modeling of Proteins*

Computer models for E-F33Y-Cu<sub>B</sub>Mb and E-G65Y-Cu<sub>B</sub>Mb were created using Visual Molecular Dynamics<sup>11</sup> (VMD) and NAMD<sup>12</sup> (Molecular Dynamics Simulator) as described previously<sup>2</sup> with the following changes: The obtained E-Cu<sub>B</sub>Mb structure was used as a starting crystal structure and non-heme metals were not introduced into the simulation.

### *UV-Visible Spectroscopy*

All UV-visible spectra were taken using an Agilent 8453 spectrometer (Agilent Technologies, Santa Clara, CA) using the supplied Chemstation software and kinetics package. Ferric protein spectra were obtained by using a 2 mL solution of 6  $\mu$ M protein in buffer, as isolated. Deoxy protein spectra were taken after addition of excess sodium dithionite, for unambiguous assignment. For oxy protein spectra, the protein was reduced using ascorbic acid (1000 eq) and *N,N,N',N'*-Tetramethyl-*p*-phenylenediamine

dihydrochloride (TMPD) (100 eq) and oxygen was bubbled into solution to ensure a clean oxygen-bound spectra.

For kinetic spectra monitoring the effect of reduction, 2 mL of 6  $\mu\text{M}$  protein in air-saturated 50 mM potassium phosphate pH 6 with catalase (0.12 mg/mL) in a cuvette (sealed with a septum, wrapped with parafilm, and with stirring under an argon headspace) was first collected to obtain a ferric protein spectra. Then ascorbic acid (1000 eq) and TMPD (100 eq) was added and spectra were taken over time period of 60 minutes.

For determination of heme degradation rate, 4 mL of 18  $\mu\text{M}$  protein was reduced using ascorbic acid (1000 eq) and TMPD (100 eq) in 50 mM potassium phosphate pH 6, In the absence or presence of up to 2 eq  $\text{CuSO}_4$  and with or without 2.2  $\mu\text{M}$  catalase. After addition of reductant the cuvette was capped to minimize oxygen from the air diffusing into solution. The rate obtained was used to correct observed rates of oxygen consumption obtained in the presence of copper for loss of heme due to degradation.

### ***Oxygen Consumption Rate and Turnover Studies using an Oxygen Electrode***

Ascorbic acid (1000 eq) and TMPD (100 eq) were added to 500  $\mu\text{L}$  of 18  $\mu\text{M}$  protein in air saturated 50 mM potassium phosphate pH 6. We choose to study the protein at pH 6 because we found that the enzymatic activity is higher at lower pH, likely due to more availability of protons, which can play a significant role in  $\text{O}_2$  reduction to water. Consumption of oxygen was monitored using an oxygen electrode (Oxytherm System, Hansatech Instruments Ltd., Norfolk, England) with data collected every 0.1 seconds or a YSI Model 53 oxygen meter equipped with a water-jacketed and stirred-glass measuring vessel (1.8mL volume) with data collection every 0.6 seconds. Rates were calculated taking the derivative of the oxygen concentration using a 30 s data window (300 points or 50 points). For data where catalase and SOD (Enzo Life Sciences International, Inc., Plymouth Meeting, PA) were used, 2.2  $\mu\text{M}$  and 250 units (as defined by manufacturer) were added, respectively, before addition of reductant. The reaction of catalase and SOD with hydrogen peroxide and superoxide respectively should produce one equivalent oxygen per two equivalents of the respective ROS<sup>13,14</sup>. The maximum initial rate was reported after subtraction of the background rate from reductant only. 8000 eq of ascorbate and 800 eq of TMPD was used in optimized condition which showed highest activity for E-G65Y-Cu<sub>B</sub>Mb.

The rates of oxygen consumption leading to water and reactive oxygen species were calculated as follows – the rate with ROS scavengers was subtracted from the rate without. The difference in rate doubled was the rate of ROS production (1 eq.  $\text{O}_2$  produced for 2 eq. ROS consumed). The rate of ROS production was subtracted from the total rate to obtain the rate of oxygen consumption producing water. Propagation of uncertainty was carried out throughout, assuming the uncertainties were not covariant.

Turnover studies were performed with the same starting conditions as the rate studies, except that the starting oxygen concentration was  $\sim 500 \mu\text{M}$  ( $\sim 28$  eq). Reductant was added and oxygen consumption was monitored until all oxygen was consumed. After the consumption of all oxygen, approximately 500  $\mu\text{M}$  of oxygen was introduced into solution through adding oxygen gas into the head space of sealed chamber. This process was repeated until we reached the observed number of turnovers. The number of turnovers during the oxygen addition was not considered in calculation of turnovers. After every 4 cycles, ascorbic acid ( $\sim 330$  eq) and TMPD ( $\sim 33$  eq) was added to compensate for consumed reductant.

### ***<sup>17</sup>O Nuclear Magnetic Resonance***

<sup>1</sup>H decoupled <sup>17</sup>O NMR spectra were collected at 81.3 MHz on a Varian UNITY INOVA spectrometer with a 5 mm AutoTuneX probe. Temperature was held constant at 25 °C by an FTS Systems unit. Gradient shimming was performed and the water signal was referenced to 0 ppm. Samples were placed inside an Omni-Fit NMR tube from Wilmad LabGlass (Vineland, NJ). <sup>17</sup>O labeled (phenol-<sup>17</sup>O 35 %) L-tyrosine ( $\sim 380$  mM in water) was sealed inside of a capillary and placed inside the Omni-Fit (gas tight) NMR tube, serving as an external standard against which the  $\text{H}_2^{17}\text{O}$  signal could be monitored. An external standard was used instead of an internal standard due to the high pH requirement for solubility as well as eliminating any possible interference in the reaction. The L-tyrosine concentration used allowed

detection in a matter of minutes and overcame the small volume of the capillary as well as 35% labeling of L-tyrosine. *N,N,N',N'*-Tetramethyl-*p*-phenylenediamine dihydrochloride (TMPD) and ascorbic acid was added to the protein solution resulting in a 500  $\mu$ L volume sample at a concentration of 50  $\mu$ M protein, 5 mM TMPD, and 50 mM ascorbic acid in 50 mM potassium phosphate pH 6. Without delay an initial spectrum was collected over a period of ten minutes followed by removal from the instrument, injection of 1 mL  $^{17}\text{O}_2$  at roughly atmospheric pressure (Cambridge Isotope Laboratories, Inc., Andover, MA, 70.7% oxygen-17 content) into the Omni-Fit NMR tube, sealing of the port, inversion for 15 seconds to aid in oxygen saturation of the solution, and subsequent data collection. During data collection the tube was spun at 10Hz to aid in mixing. Time points were collected as appropriate. In between each time point the tube was removed from the instrument, inverted for 15 seconds, and replaced. Data were analyzed using MestReNova (Mestrelab Research, Santiago de Compostela, Spain). The area of the tyrosine signal was set to 1 for all spectra and the area of the water signal was recorded in relation to this value.

### ***UV-Visible Electronic Absorption Studies***

Native or wild type sperm whale myoglobin (WTswMb) was used as a control for all UV-vis experiments. The ferric [Fe(III)] form (i.e. metMb), which is similar to the resting state of HCO, displays a Soret band  $\sim$  409 nm, and visible absorption bands  $\sim$  500 nm and 632 nm in the UV-visible spectrum (Supplementary Fig. 5A, black line). Upon reduction of ferric-WTswMb, the Soret band shifted to 432 nm, and the visible bands merged to a single band at 556 nm, typical of a reduced ferrous [Fe(II)] heme protein, called deoxyMb (Supplementary Fig. 5A, red line). Exposure to oxygen shifted the Soret band of deoxyMb to 418 nm and split the visible absorption into two bands  $\sim$  540 and 580 nm, indicating the formation of oxyMb (Supplementary Fig. 5A, blue line). These results are similar to those reported previously<sup>15</sup>.

### ***Determination of $K_d$ for F33Y Cu<sub>B</sub>Mb and G65Y Cu<sub>B</sub>Mb for copper***

E-F33Y-Cu<sub>B</sub>Mb and E-G65Y-Cu<sub>B</sub>Mb were titrated with increasing amounts of copper and monitored using UV-Visible spectroscopy using a previously described method<sup>1</sup> to determine  $K_d$ . The spectra were analyzed using the method described by Bidwai, A. et al.<sup>16</sup> The determined  $K_d$  for F33Y-Cu<sub>B</sub>Mb and G65Y-Cu<sub>B</sub>Mb are 2  $\mu$ M and 100  $\mu$ M respectively.

### ***Investigation of Oxygen Consumption Activity with copper***

To more thoroughly investigate the effect of copper on Cu<sub>B</sub>Mb, F33Y-Cu<sub>B</sub>Mb, and G65Y-Cu<sub>B</sub>Mb, oxygen consumption rate studies with up to 2 eq CuSO<sub>4</sub> were performed. Under these conditions, the observed rate increased relative to those in the absence of copper; however, upon repeating in the presence 2.2  $\mu$ M catalase, the apparent rate was too low to assign the observed copper induced rate increase in the absence of catalase to an increased HCO-like activity. The increase is therefore due to increased ROS production by copper and excess reductant. Under these conditions there was also a copper dependent heme oxygenase activity similar to that reported at pH 8 previously. Therefore, the observed HCO activity rates were corrected for the amount of verdoheme produced from heme (Supplementary Table 4) as this would inactivate a population of the protein assayed.

## Supplementary Figures

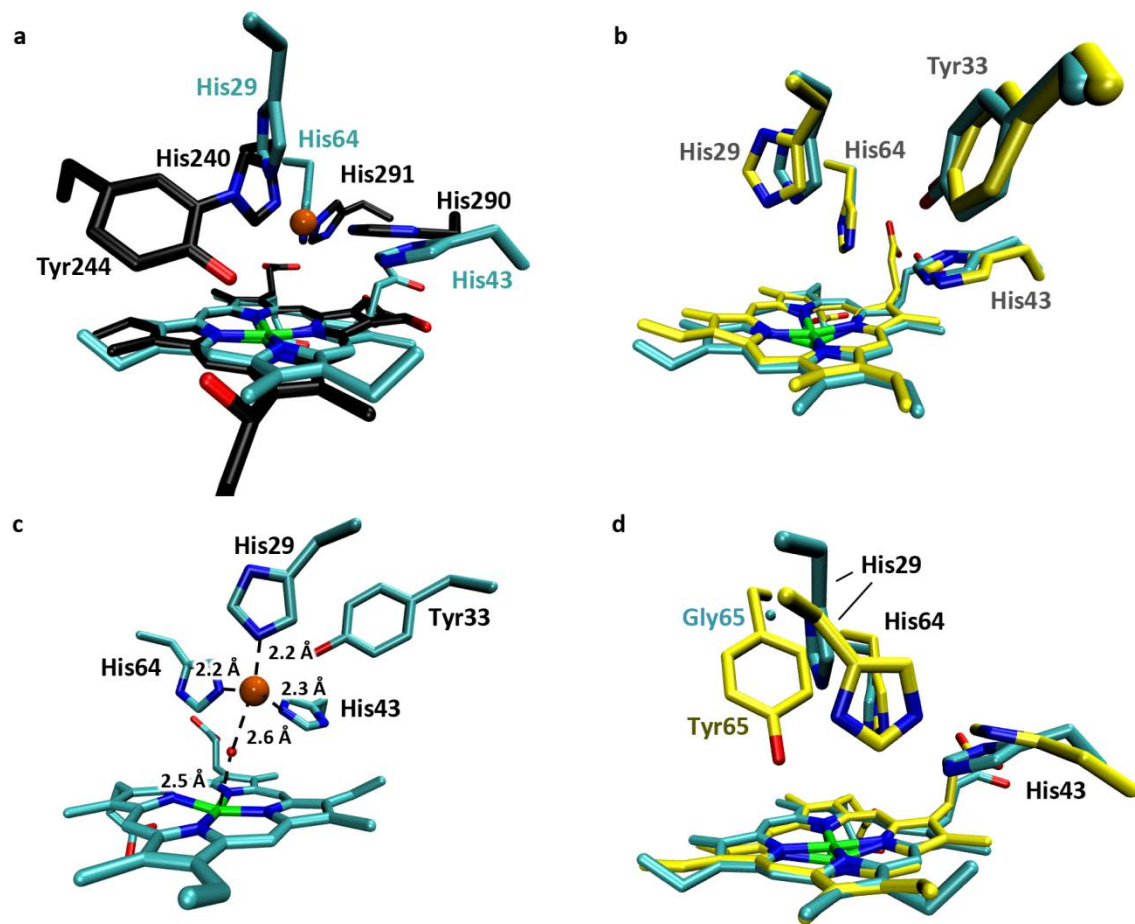

**Figure S1.** Additional Structures of Cu<sub>B</sub>Mb and Tyr containing mutants. (a) Overlay of the crystal structures of native bovine CcO<sup>17</sup> (black) and designed E-Cu<sub>B</sub>Mb (cyan); (b) Overlay of the computer model (yellow) and crystal structure (cyan) of E-F33Y-Cu<sub>B</sub>Mb. (c) Crystal structure of Cu-F33Y-Cu<sub>B</sub>Mb. Note: The distance between the copper (orange sphere) and the heme iron is 5.1 Å. (d) Overlay of E-Cu<sub>B</sub>Mb crystal structure (cyan) and the computer model of E-G65Y-Cu<sub>B</sub>Mb (yellow). Note: Gly65 is represented by the cyan sphere corresponding to the alpha carbon of Gly65

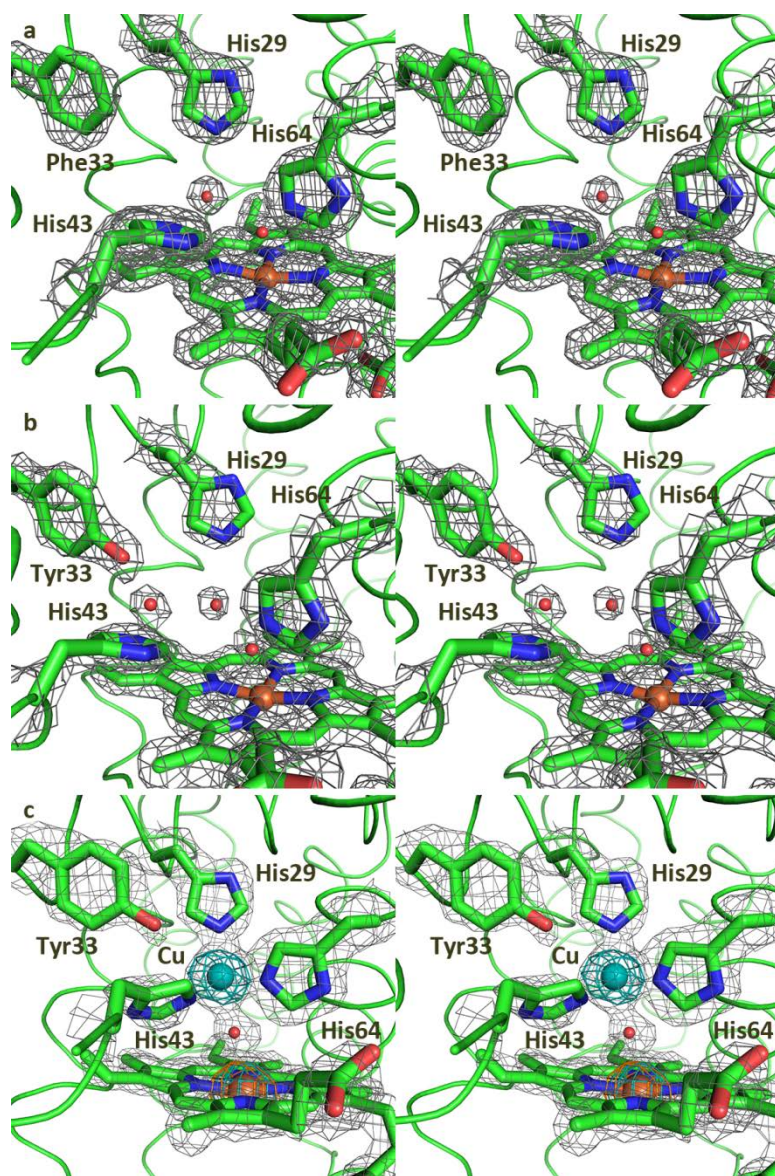

**Figure S2.** 2fo-fc electron density maps overlaid with presented crystal structures at a cutoff value of  $1.3\sigma$ . (a) E- $\text{Cu}_B\text{Mb}$  (b) E-F33Y- $\text{Cu}_B\text{Mb}$  (c) Cu-F33Y- $\text{Cu}_B\text{Mb}$ . Anomalous density for Cu-F33Y- $\text{Cu}_B\text{Mb}$  below ( $1.3880 \text{ \AA}$ ; orange) and above ( $1.372 \text{ \AA}$ ; teal) Cu-K edge energy ( $1.3808 \text{ \AA}$ ) at  $5\sigma$  cutoff are shown in this panel (expected  $f'$  values at these wavelengths are 0.49 and 3.8 e for Cu and 2.7 e at both wavelengths for Fe). Note: Water over the heme iron in the E- $\text{Cu}_B\text{Mb}$  structure (a) was assigned based on density at lower cutoff. Maps were drawn in Pymol 1.3 from “O” map files generated in SHELXPRO (a) or ccp4 map files generated in ccp4 using FFT (b, c).

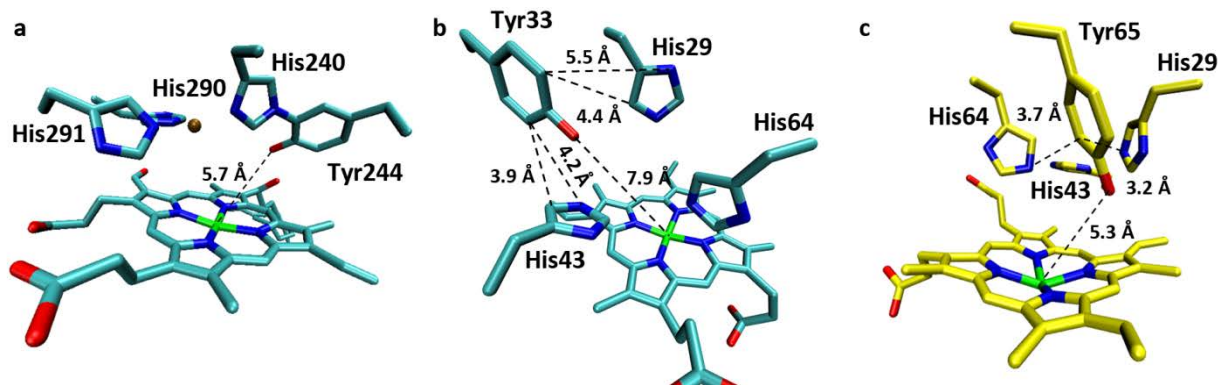

**Figure S3.** His-Tyr distances and Tyr-OH – heme Fe distances for (a) bovine CcO, (b) E-F33Y- $\text{Cu}_B\text{Mb}$  and (c) E-G65Y- $\text{Cu}_B\text{Mb}$  (model).

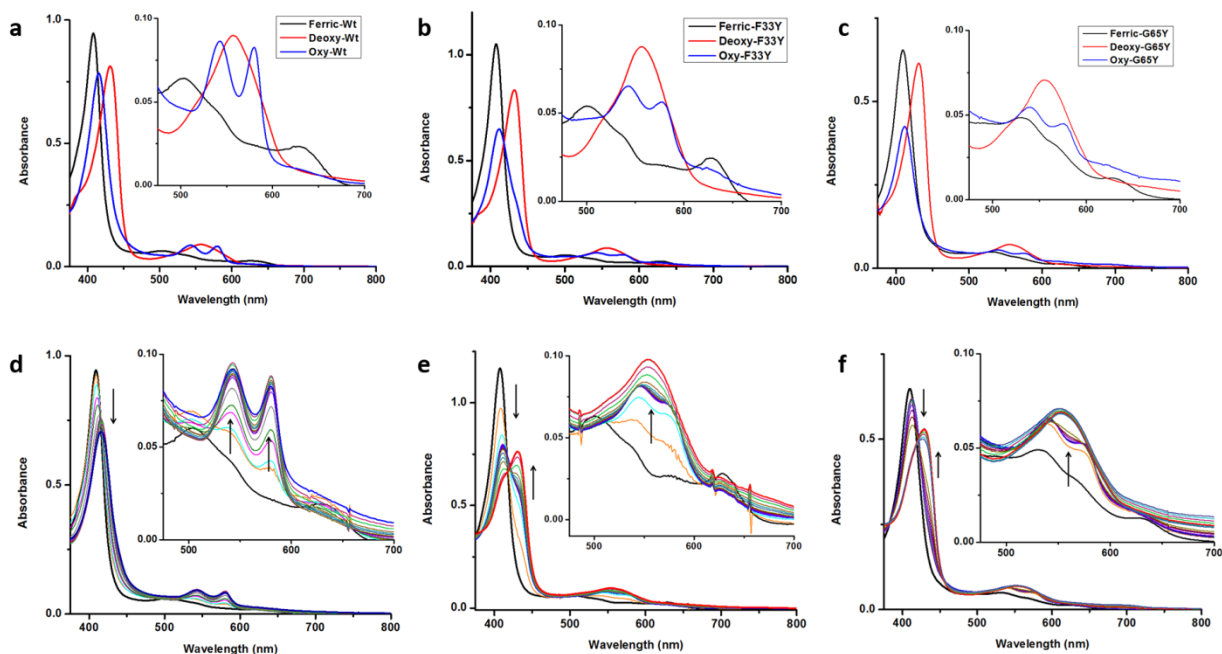

**Figure S4.** Reference spectra for ferric, oxy and deoxy forms of (a) WtswMb, (b) E-F33Y-Cu<sub>B</sub>Mb, and (c) E-G65Y-Cu<sub>B</sub>Mb. Note: The feature at 540nm in (c) is due to a bis-His ligated population in the Ferric-E-G65Y Cu<sub>B</sub>Mb.<sup>18,19</sup> UV-visible spectral changes of (d) ferric-WTswMb, (e) ferric-E-F33Y-Cu<sub>B</sub>Mb and (f) ferric-E-G65Y-Cu<sub>B</sub>Mb upon reduction with excess TMPD and ascorbate in air over 60 min.

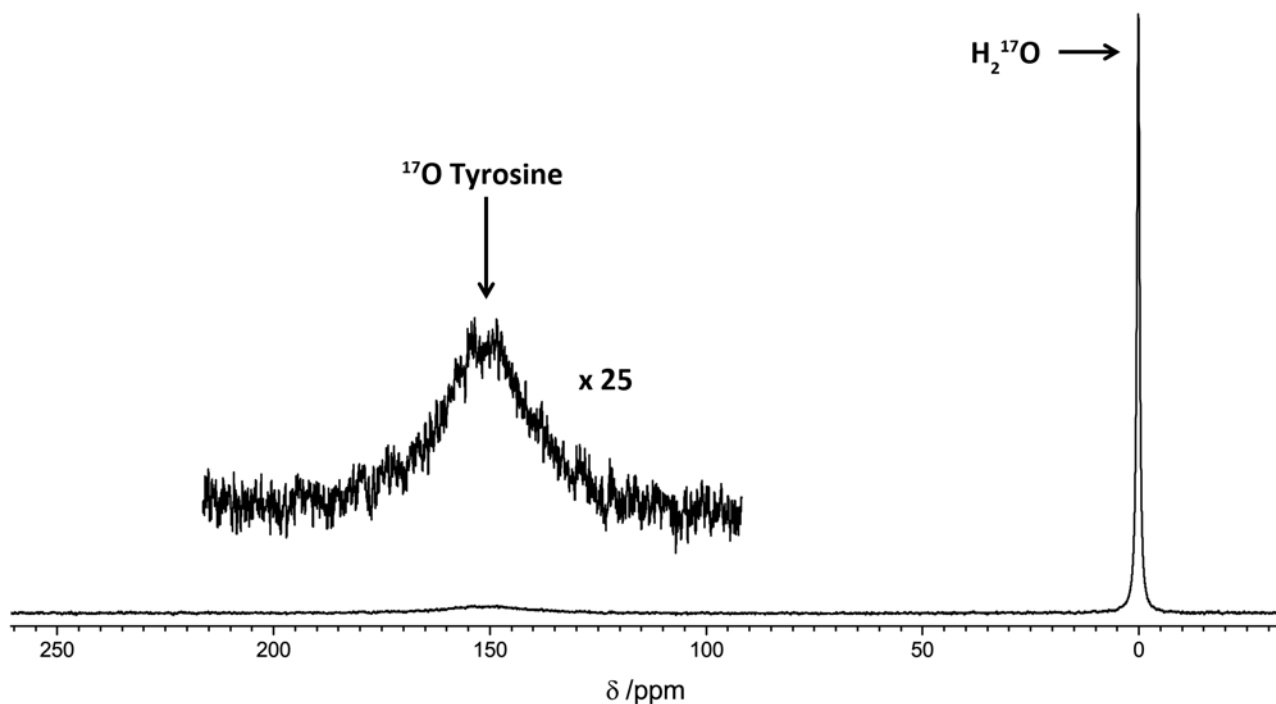

**Figure S5.** Typical <sup>17</sup>O NMR spectrum of the reaction of E-F33Y-Cu<sub>B</sub>Mb with <sup>17</sup>O<sub>2</sub>. <sup>17</sup>O Tyrosine peak scaled 25 times to show detail.

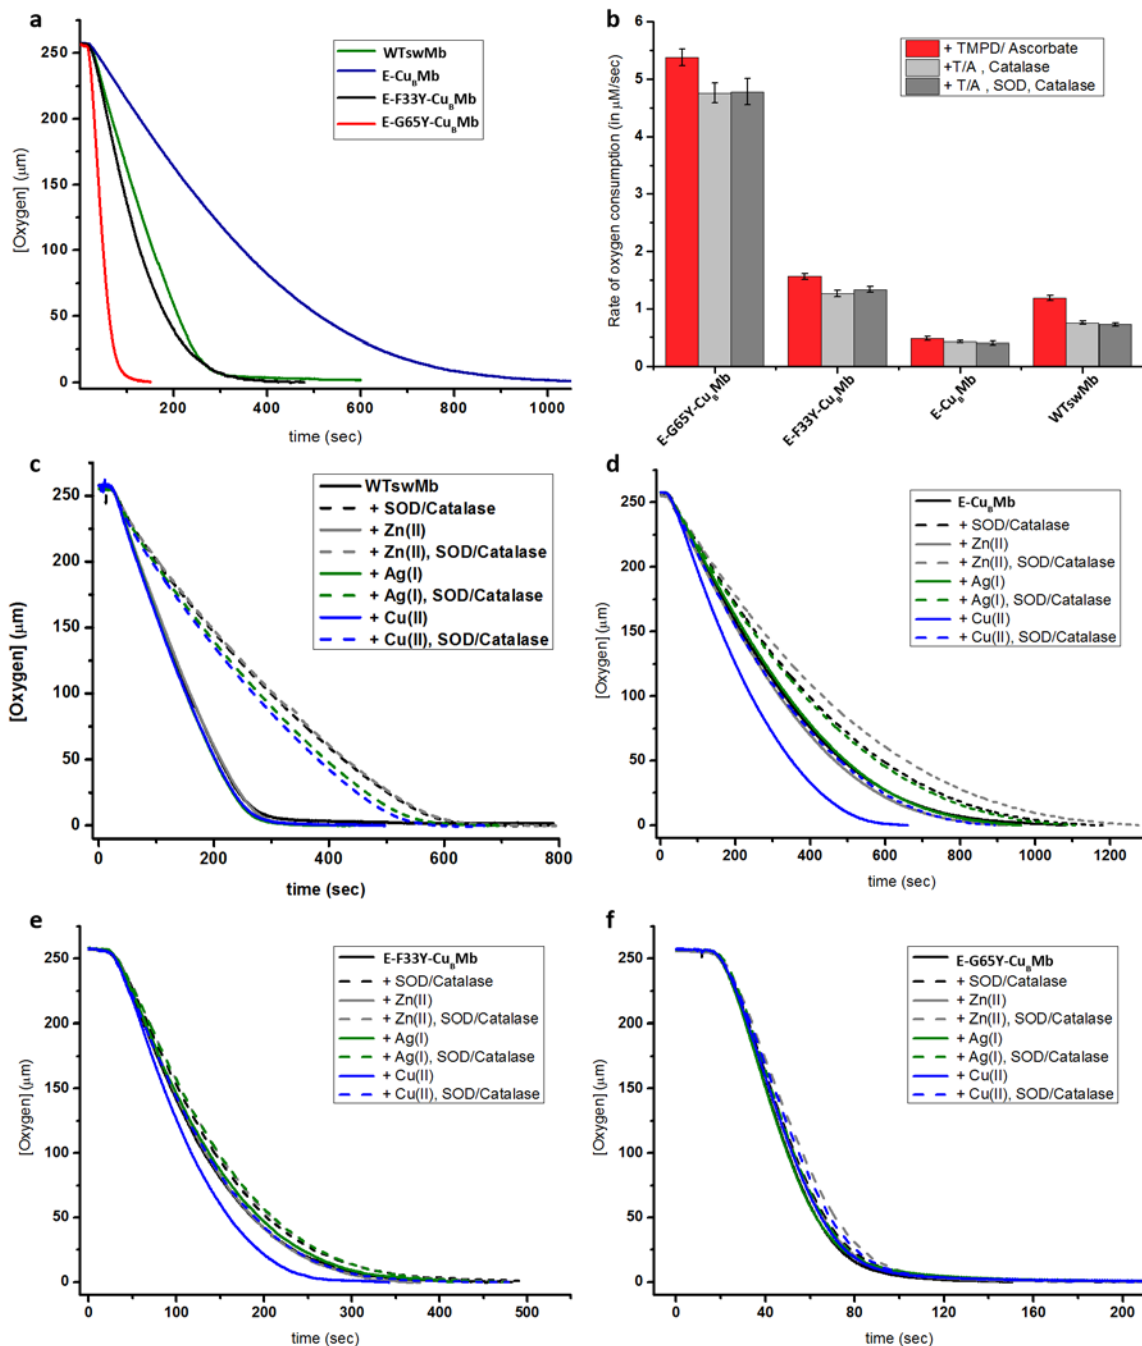

**Figure S6.** (a) Typical oxygen consumption traces for WTswMb (green), E-Cu<sub>B</sub>Mb (blue), E-F33Y-Cu<sub>B</sub>Mb (black), and E-G65Y-Cu<sub>B</sub>Mb (red). (b) Oxygen consumption rates for all four proteins with and without SOD and catalase. (c) Typical oxygen consumption traces for WTswMb with and without SOD and catalase in the presence or absence of 1eq. Zn(II), Ag(I), or Cu(II). Typical oxygen consumption traces for (d) E-Cu<sub>B</sub>Mb, (e) E-F33Y-Cu<sub>B</sub>Mb and (f) E-G65Y-Cu<sub>B</sub>Mb under the same conditions as (c). Note that the x-axes in (c) to (f) are plotted on different scales to clearly show small differences in the presence of metal ions. Error bars indicate standard deviation



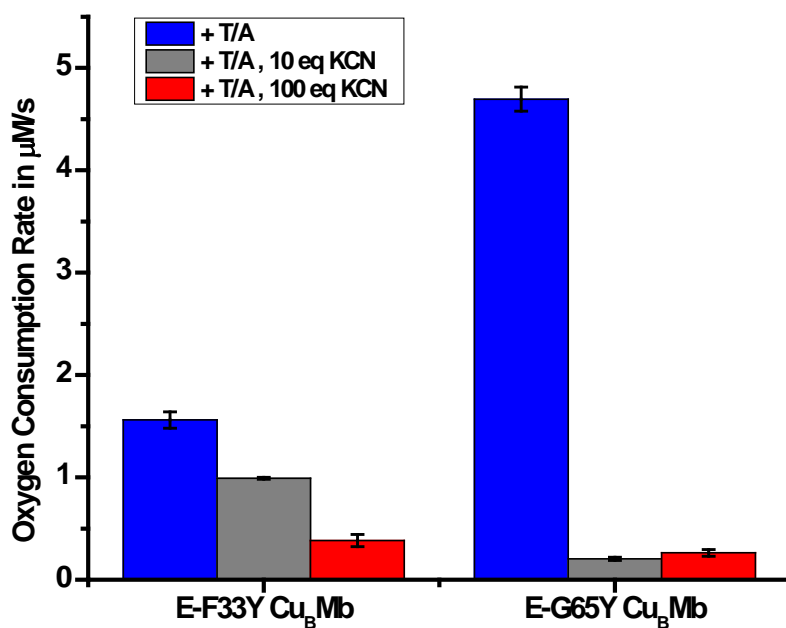

**Figure S7.** Effect of cyanide on E-F33Y- $\text{Cu}_B$ Mb and E-G65Y- $\text{Cu}_B$ Mb oxygen consumption activity. Error bars indicate standard deviation.

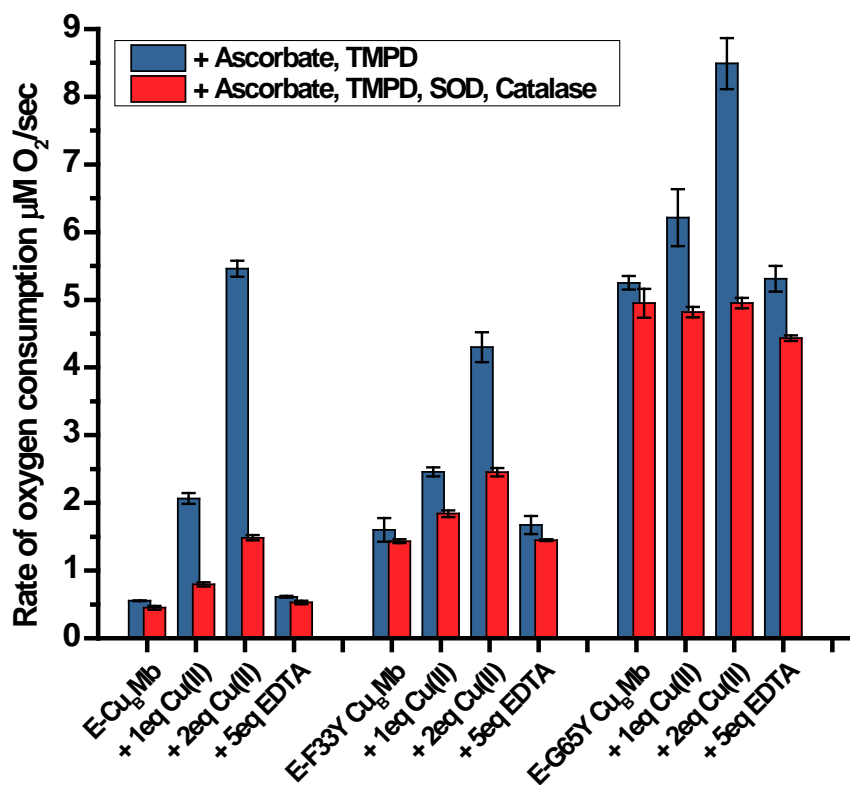

**Figure S8.** Oxygen consumption rates in the presence of EDTA and varying amounts of copper in the absence (Blue) or presence (Red) of catalase and SOD. Error bars indicate standard deviation.

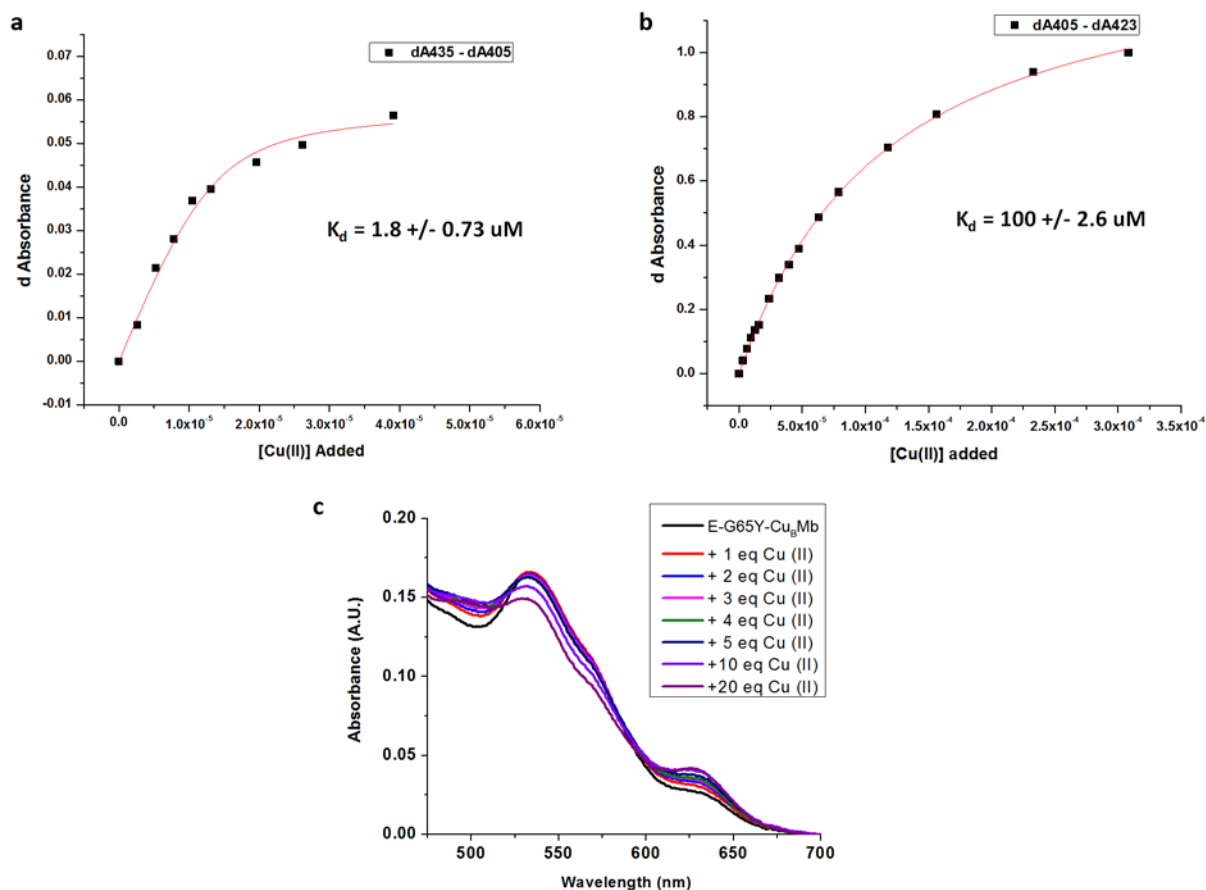

**Figure S9.**  $K_d$  values for F33Y-Cu<sub>B</sub>Mb and G65Y-Cu<sub>B</sub>Mb for copper. (a) Plot of difference in absorbance with increasing copper for F33Y-Cu<sub>B</sub>Mb. (b) Same as (a) for G65Y-Cu<sub>B</sub>Mb. (c) UV-spectra for G65Y-Cu<sub>B</sub>Mb with copper showing changes with increasing copper.

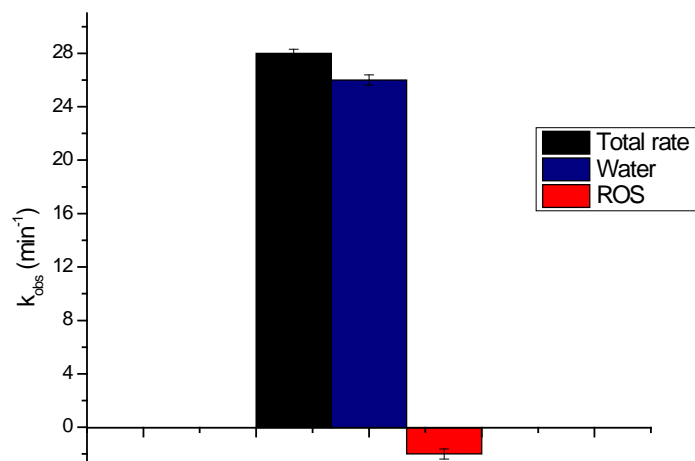

**Figure S10.** Oxygen consumption rate of E-G65Y-Cu<sub>B</sub>Mb (6 μM) in the presence 8000 eq. ascorbate and 800 eq. TMPD. Error bars indicate standard deviation.  $k_{\text{obs}}$  indicates the rate constant under unsaturated condition both in terms of O<sub>2</sub> and reductant.

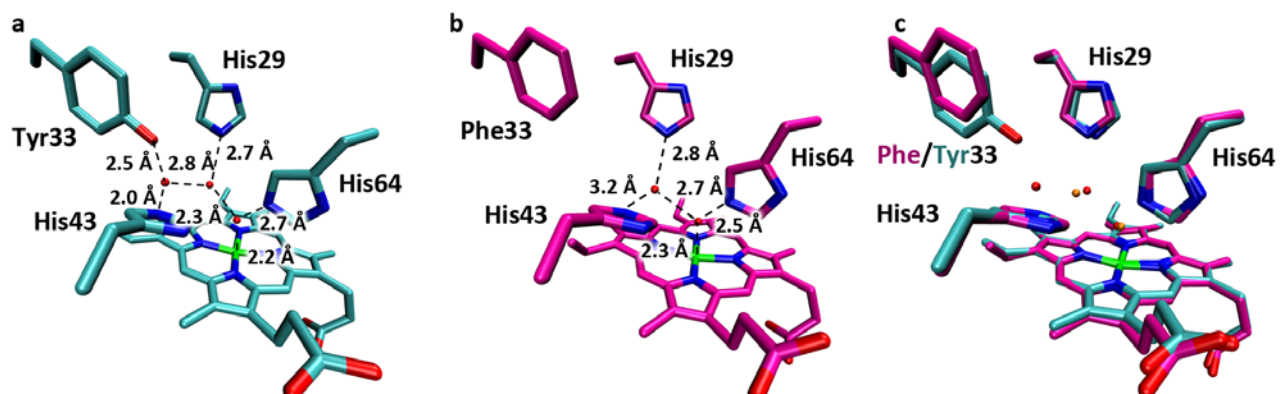

**Figure S11.** The water networks in the distal pockets of (a) E-F33Y-Cu<sub>B</sub>Mb and (b) E-Cu<sub>B</sub>Mb crystal structures. (c) Overlay of these structures (waters of Cu<sub>B</sub>Mb structure in orange).

**Table S1** – ICP-MS results for levels of Ag, Cu, Fe, S, and Zn in as purified protein

| Sample                         | Concentration (ppm) |      |       |      |      | Ratio |       |       |
|--------------------------------|---------------------|------|-------|------|------|-------|-------|-------|
|                                | Cu                  | Fe   | S     | Ag   | Zn   | Cu:Fe | Ag:Fe | Zn:Fe |
| <b>E-Cu<sub>B</sub>Mb</b>      | 0.00                | 5.60 | 8.67  | 0.01 | 0.04 | 0.00  | 0.00  | 0.01  |
| <b>E-F33Y Cu<sub>B</sub>Mb</b> | 0.00                | 5.60 | 10.76 | 0.00 | 0.04 | 0.00  | 0.00  | 0.01  |
| <b>E-G65Y Cu<sub>B</sub>Mb</b> | 0.00                | 5.60 | 9.37  | 0.00 | 0.03 | 0.00  | 0.00  | 0.00  |

All samples were normalized to 5.60 ppm Fe for clearer comparison

**Table S2** - Diffraction and refinement data for E-Cu<sub>B</sub>Mb, E-F33Y-Cu<sub>B</sub>Mb, and F33Y-Cu<sub>B</sub>Mb-Cu crystal structures

|                           | E-Cu <sub>B</sub> Mb                          | E-F33Y-Cu <sub>B</sub> Mb                     | Cu-F33Y-Cu <sub>B</sub> Mb                    |
|---------------------------|-----------------------------------------------|-----------------------------------------------|-----------------------------------------------|
| <b>Data collection</b>    |                                               |                                               |                                               |
| Beamline                  | X12B                                          | X26C                                          | X29A                                          |
| Wavelength (Å)            | 0.894                                         | 1.0000                                        | 1.0750                                        |
| Space Group               | P2 <sub>1</sub> 2 <sub>1</sub> 2 <sub>1</sub> | P2 <sub>1</sub> 2 <sub>1</sub> 2 <sub>1</sub> | P2 <sub>1</sub> 2 <sub>1</sub> 2 <sub>1</sub> |
| Cell dimension            |                                               |                                               |                                               |
| <i>a, b, c</i> (Å)        | 39.74, 47.68, 77.54                           | 39.22, 47.72, 77.09                           | 39.73, 48.29, 77.69                           |
| <i>α, β, γ</i> (°)        | 90.00, 90.00, 90.00                           | 90.00, 90.00, 90.00                           | 90.00, 90.00, 90.00                           |
| Resolution (Å)            | 1.90(1.97 – 1.90)                             | 1.90(1.93 – 1.90)                             | 1.80(1.86 – 1.80)                             |
| R-merge                   | 0.065(0.347)                                  | 0.118(0.575)                                  | 0.111(0.637)                                  |
| I/σI                      | 40.1(9.8)                                     | 35.9(4.7)                                     | 23.3(4.6)                                     |
| No. of Unique reflections | 12,087                                        | 12,106                                        | 14,457                                        |
| Completeness (%)          | 99.7(98.7)                                    | 99.4(100.0)                                   | 100.0(100.0)                                  |
| <b>Refinement</b>         |                                               |                                               |                                               |
| Resolution (Å)            | 50.0– 1.90 (1.95-1.90)                        | 50.0– 1.90 (1.95-1.90)                        | 41.01– 1.80 (1.84-1.80)                       |
| Rwork/Rfree               | 0.204(0.245)/0.275(0.327)                     | 0.210 (0.285)/0.266(0.429)                    | 0.199(0.221)/0.247(0.331)                     |
| No. reflections           | 11,305                                        | 11,259                                        | 13,729                                        |
| No. atoms                 |                                               |                                               |                                               |
| Protein                   | 1,218                                         | 1,219                                         | 1,218                                         |
| Hem/Ion                   | 42/1FE                                        | 42/1FE                                        | 42/1FE/1CU/4CU                                |
| Water                     | 144                                           | 25                                            | 48                                            |
| Metal Ion                 | Fe                                            | Fe                                            | Fe, Cu                                        |
| B-factor                  |                                               |                                               |                                               |
| Protein                   | 23.4                                          | 29.9                                          | 34.0                                          |
| HEM/Ion                   | 18.4/18.2                                     | 25.1/24.5                                     | 34.5/27.1/38.41/61.6                          |
| Water                     | 37.4                                          | 26.8                                          | 36.5                                          |
| ESD(ESU)                  | 0.017                                         | 0.131                                         | 0.097                                         |
| Rms. deviations           |                                               |                                               |                                               |
| Bond lengths(Å)           | 0.006                                         | 0.018                                         | 0.019                                         |
| Bond angles (°)           | 1.842                                         | 3.198                                         | 3.182                                         |

**Table S3** – Data collection statistics for F33Y-Cu<sub>B</sub>Mb-Cu at above and below the copper K-edge (1.3808 Å).

|                                    | Cu-F33Y-Cu <sub>B</sub> Mb                    |                                               |
|------------------------------------|-----------------------------------------------|-----------------------------------------------|
| <b>Data collection</b>             |                                               |                                               |
| Wavelength (Å)                     | 1.3880                                        | 1.3720                                        |
| Space Group                        | P2 <sub>1</sub> 2 <sub>1</sub> 2 <sub>1</sub> | P2 <sub>1</sub> 2 <sub>1</sub> 2 <sub>1</sub> |
| Cell dimension                     |                                               |                                               |
| <i>a</i> , <i>b</i> , <i>c</i> (Å) | 39.68, 48.18, 77.48                           | 39.69, 48.19, 77.51                           |
| $\alpha$ , $\beta$ , $\gamma$ (°)  | 90.00, 90.00, 90.00                           | 90.00, 90.00, 90.00                           |
| Resolution (Å)                     | 50-2.12(2.20-2.12)                            | 50-2.12(2.20-2.12)                            |
| R-merge                            | 0.094(0.584)                                  | 0.098(0.628)                                  |
| I/ $\sigma$ I                      | 35.9(4.7)                                     | 23.3(4.6)                                     |
| No. of Unique reflections          | 8,795                                         | 8976                                          |
| Completeness (%)                   | 100.0(99.9)                                   | 100.0(100.0)                                  |

**Table S4** – Verdoheme formation rates (s<sup>-1</sup>) in the absence and presence of catalase and SOD. Error indicated is standard deviation.

| Reagents Added                          | E-Cu <sub>B</sub> Mb     |                         | E-F33Y Cu <sub>B</sub> Mb |                         | E-G65Y Cu <sub>B</sub> Mb |                         |
|-----------------------------------------|--------------------------|-------------------------|---------------------------|-------------------------|---------------------------|-------------------------|
| + 1 eq Cu <sup>2+</sup>                 | 8.47 ×10 <sup>-3</sup> ± | 0.379 ×10 <sup>-3</sup> | 3.77 ×10 <sup>-3</sup> ±  | 0.130 ×10 <sup>-3</sup> | 8.83 ×10 <sup>-3</sup> ±  | 1.00 ×10 <sup>-3</sup>  |
| + 2 eq Cu <sup>2+</sup>                 | 19.0 ×10 <sup>-3</sup> ± | 0.812 ×10 <sup>-3</sup> | 7.91 ×10 <sup>-3</sup> ±  | 0.454 ×10 <sup>-3</sup> | 19.5 ×10 <sup>-3</sup> ±  | 0.790 ×10 <sup>-3</sup> |
| + 1 eq Cu <sup>2+</sup> , Catalase, SOD | 3.38 ×10 <sup>-3</sup> ± | 0.409 ×10 <sup>-3</sup> | 2.07 ×10 <sup>-3</sup> ±  | 0.087 ×10 <sup>-3</sup> | 1.98 ×10 <sup>-3</sup> ±  | 0.117 ×10 <sup>-3</sup> |
| + 2 eq Cu <sup>2+</sup> , Catalase, SOD | 8.67 ×10 <sup>-3</sup> ± | 1.24 ×10 <sup>-3</sup>  | 5.78 ×10 <sup>-3</sup> ±  | 0.491 ×10 <sup>-3</sup> | 2.58 ×10 <sup>-3</sup> ±  | 0.322 ×10 <sup>-3</sup> |

**Table S5** – Rates of oxygen reduction to form either water or superoxide/peroxide (ROS) with 18 μM WTswMb, Cu<sub>B</sub>Mb, F33Y-Cu<sub>B</sub>Mb, or G65Y-Cu<sub>B</sub>Mb, with and without metal.

|              | Rate of O <sub>2</sub> consumption (μM s <sup>-1</sup> ) |                  |                |
|--------------|----------------------------------------------------------|------------------|----------------|
|              | Total                                                    | To produce water | To produce ROS |
| WTswMb       | 1.18 ± 0.048                                             | 0.26 ± 0.068     | 0.9 ± 0.11     |
| + 1eq Zn(II) | 1.16 ± 0.014                                             | 0.23 ± 0.055     | 0.93 ± 0.060   |
| + 1eq Ag(I)  | 1.19 ± 0.039                                             | 0.25 ± 0.080     | 0.9 ± 0.10     |
| + 1eq Cu(II) | 1.26 ± 0.038                                             | 0.31 ± 0.058     | 0.95 ± 0.088   |
| E-CuBMb      | 0.49 ± 0.035                                             | 0.33 ± 0.073     | 0.16 ± 0.095   |
| + 1eq Zn(II) | 0.504 ± 0.0078                                           | 0.27 ± 0.048     | 0.24 ± 0.050   |
| + 1eq Ag(I)  | 0.45 ± 0.037                                             | 0.4 ± 0.13       | 0.1 ± 0.15     |
| + 1eq Cu(II) | 0.75 ± 0.046                                             | 0.30 ± 0.071     | 0.5 ± 0.11     |
| E-F33Y CuBMb | 1.56 ± 0.055                                             | 1.1 ± 0.12       | 0.5 ± 0.15     |
| + 1eq Zn(II) | 1.47 ± 0.067                                             | 1.09 ± 0.076     | 0.4 ± 0.14     |
| + 1eq Ag(I)  | 1.53 ± 0.058                                             | 1.0 ± 0.12       | 0.5 ± 0.16     |
| + 1eq Cu(II) | 1.9 ± 0.11                                               | 0.9 ± 0.17       | 1.0 ± 0.26     |
| E-G65Y CuBMb | 5.4 ± 0.15                                               | 4.2 ± 0.49       | 1.2 ± 0.55     |
| + 1eq Zn(II) | 4.9 ± 0.24                                               | 3.9 ± 0.25       | 1.0 ± 0.48     |
| + 1eq Ag(I)  | 5.2 ± 0.28                                               | 4.9 ± 0.38       | 0.3 ± 0.61     |
| + 1eq Cu(II) | 5.02 ± 0.040                                             | 4.2 ± 0.11       | 0.9 ± 0.13     |

**Table S6** – Relative concentration of H<sub>2</sub><sup>17</sup>O (normalized to initial concentrations) in reactions catalysed by WTswMb, E-F33Y-Cu<sub>B</sub>Mb, and E-G65Y-Cu<sub>B</sub>Mb.

|                           | Relative concentration of H <sub>2</sub> <sup>17</sup> O |              |              |                |
|---------------------------|----------------------------------------------------------|--------------|--------------|----------------|
|                           | 30 min                                                   | 60 min       | 90 min       | 120 min        |
| WTswMb                    | 0.9 ± 0.12                                               | 0.86 ± 0.026 | 0.88 ± 0.027 | 0.99 ± 0.015   |
| E-F33Y-Cu <sub>B</sub> Mb | 1.14 ± 0.079                                             | 1.16 ± 0.050 | 1.25 ± 0.042 | 1.426 ± 0.0063 |
| E-G65Y-Cu <sub>B</sub> Mb | 1.2 ± 0.16                                               | 1.25 ± 0.071 | 1.4 ± 0.12   | 1.5 ± 0.19     |

## References

- (1) Sigman, J. A.; Kwok, B. C.; Lu, Y. *J. Am. Chem. Soc.* **2000**, *122*, 8192.
- (2) Yeung, N.; Lin, Y.-W.; Gao, Y.-G.; Zhao, X.; Russell, B. S.; Lei, L.; Miner, K. D.; Robinson, H.; Lu, Y. *Nature* **2009**, *462*, 1079.
- (3) Otwinowski, Z.; Minor, W. *Methods Enzymol.* **1997**, *276*, 307.
- (4) Vagin, A.; Teplyakov, A. *J. Appl. Crystallogr.* **1997**, *30*, 1022.
- (5) Bailey, S. *Acta Crystallogr.* **1994**, *D50*, 760.
- (6) Brunger, A. T.; Adams, P. D.; Clore, G. M.; DeLano, W. L.; Gros, P.; Grosse-Kunstleve, R. W.; Jiang, J.-S.; Kuszewski, J.; Nilges, M.; Pannu, N. S.; Read, R. J.; Rice, L. M.; Simonson, T.; Warren, G. L. *Acta Crystallogr.* **1998**, *D54*, 905.
- (7) Sheldrick, G. M.; Schneider, T. R. *Methods Enzymol.* **1997**, *277*, 319.
- (8) Jones, T. A.; Zou, J. Y.; Cowan, S. W.; Kjeldgaard, M. *Acta Crystallogr.* **1991**, *A47*, 110.
- (9) Vagin, A. A.; Steiner, R. A.; Lebedev, A. A.; Potterton, L.; McNicholas, S.; Long, F.; Murshudov, G. N. *Acta Crystallogr.* **2004**, *D60*, 2184.
- (10) Emsley, P.; Cowtan, K. *Acta Crystallogr.* **2004**, *D60*, 2126.
- (11) Humphrey, W.; Dalke, A.; Schulten, K. *J. Mol. Graphics* **1996**, *14*, 33.
- (12) Phillips, J. C.; Braun, R.; Wang, W.; Gumbart, J.; Tajkhorshid, E.; Villa, E.; Chipot, C.; Skeel, R. D.; Kale, L.; Schulten, K. *J. Comput. Chem.* **2005**, *26*, 1781.
- (13) McCord, J. M.; Fridovich, I. *J. Biol. Chem.* **1969**, *244*, 6049.
- (14) Murthy, M. R. N.; Reid, T. J., III; Sicignano, A.; Tanaka, N.; Rossmann, M. G. *J. Mol. Biol.* **1981**, *152*, 465.
- (15) Antonini, E.; Brunori, M.; Neuberger, A.; Tatum, E. L. *Hemoglobin and Myoglobin in their Reactions with Ligands*; Elsevier New York N. Y., 1971; Vol. 21.
- (16) Bidwai, A.; Witt, M.; Foshay, M.; Vitello, L. B.; Satterlee, J. D.; Erman, J. E. *Biochemistry* **2003**, *42*, 10764.
- (17) Tsukihara, T.; Shimokata, K.; Katayama, Y.; Shimada, H.; Muramoto, K.; Aoyama, H.; Mochizuki, M.; Shinzawa-itoh, K.; Yamashita, E.; Yao, M.; Ishimura, Y.; Yoshikawa, S. *Proc. Natl. Acad. Sci. U.S.A.* **2003**, *100*, 15304.
- (18) Diven, W. F.; Goldsack, D. E.; Alberty, R. A. *J. Biol. Chem.* **1965**, *240*, 2437.
- (19) Lin, Y.-W.; Yeung, N.; Gao, Y.-G.; Miner, K. D.; Lei, L.; Robinson, H.; Lu, Y. *J. Am. Chem. Soc.* **2010**, *132*, 9970.
